1 **Genomics of expanded avian sex chromosomes**  
2 **shows that certain chromosomes are predisposed**  
3 **towards sex-linkage in vertebrates**

4

5 Running head: Genomics of lark sex chromosomes

6

7 Hanna Sigeman<sup>a#</sup>, Suvi Ponnikas<sup>a</sup>, Pallavi Chauhan<sup>a</sup>, Elisa Dierickx<sup>b</sup>, M. de L.  
8 Brooke<sup>b</sup>, Bengt Hansson<sup>a,#</sup>

9

10 <sup>a</sup>Department of Biology, Lund University, Ecology Building, 223 62 Lund, Sweden

11 <sup>b</sup>Department of Zoology, University of Cambridge, Downing Street, Cambridge CB2 3EJ, UK

12

13

14

15 <sup>#</sup> Correspondence: [hanna.sigeman@biol.lu.se](mailto:hanna.sigeman@biol.lu.se); [bengt.hansson@biol.lu.se](mailto:bengt.hansson@biol.lu.se).

## 16 ABSTRACT

17 Sex chromosomes have evolved from the same autosomes multiple times across vertebrates,  
18 suggesting that certain genomic regions are predisposed towards sex-linkage. However, to test this  
19 hypothesis detailed studies of independently originated sex-linked regions and their gene content  
20 are needed. Here we address this problem through comparative genomics of birds where multiple  
21 chromosomes appear to have formed neo-sex chromosomes: larks (Alaudidae; Sylvioidea). We  
22 detected the largest known avian sex chromosome (195.3 Mbp) and show that it originates from  
23 fusions between (parts of) four avian chromosomes (Z, 3, 4A and 5). We found evidence of five  
24 evolutionary strata where recombination has been suppressed at different time points, and that  
25 these time points correlate with the level of Z-W gametolog differentiation. We show that there is  
26 extensive homology to sex chromosomes in other vertebrate lineages: three of the fused  
27 chromosomes (Z, 4A, 5) have independently evolved into sex chromosomes in fish (Z), turtles (Z,  
28 5), lizards (Z, 4A) and mammals (Z, 4A). Moreover, we found that the fourth chromosome,  
29 chromosome 3, was significantly enriched for genes with predicted sex-specific functions. These  
30 results support a key role of chromosome content in the evolution of sex chromosomes in  
31 vertebrates.

32

33 Sex chromosome | fusion | resequencing | Sylvioidea | larks | birds

## 34 1. INTRODUCTION

35 Sex chromosomes have evolved from autosomes many times independently across the tree of life. The most  
36 generic hypothesis for the evolution of sex chromosomes invokes a selective advantage of linkage between  
37 sex-determining and sexually antagonistic genes (Haldane 1922; Fisher 1931; Lewis & John 1968; D.  
38 Charlesworth & B. Charlesworth 1980). Accordingly, this hypothesis suggests that the chromosomes  
39 harbouring these genes should frequently be involved in the formation, transition and turnover of sex

40 chromosomes (Bachtrog et al. 2011; Ross et al. 2009; O'Meally et al. 2012). Indeed, there are a limited  
41 number of genes across vertebrates that have taken on the sex-determining role, and evidence is  
42 accumulating that the chromosomes on which these reside have evolved into sex chromosomes several  
43 times independently in different lineages (reviewed in O'Meally et al. 2012; Ezaz et al. 2006; Ezaz et al.  
44 2016). Furthermore, it has been suggested that some autosomes fuse with existing sex chromosomes into  
45 neo-sex chromosomes more easily than others due to their gene content (Kitano et al. 2009; Ross et al.  
46 2009; Pala, Hasselquist, et al. 2012; Kitano & Peichel 2011; Yoshida et al. 2014; O'Meally et al. 2012). The  
47 importance of chromosome content for the evolutionary dynamics of sex chromosomes is, however, still  
48 poorly supported due to a limited number of well-studied origins of sex-linkage.

49  
50 The sex chromosomes of birds are highly stable with a Z chromosome size of approximately 73 Mbp  
51 (Ellegren 2010). One of the few known exceptions to this stability is the neo-sex chromosome of passerines  
52 in the superfamily Sylvioidea, which has been formed by a fusion between half of chromosome 4A  
53 (according to the zebra finch *Taeniopygia guttata* nomenclature) and the ancestral sex chromosome (Pala,  
54 Naurin, et al. 2012; Pala, Hasselquist, et al. 2012; Sigeman et al. 2018). Moreover, two independent findings  
55 suggest that at least some species of larks (Alaudidae), a family within Sylvioidea, have acquired autosome–  
56 sex chromosome fusions in addition to the one including parts of 4A. Firstly, heavily enlarged sex  
57 chromosome karyotypes were found in the bimaculated lark (*Melanocorypha bimaculata*) and the horned lark  
58 (*Eremophila alpestris*; Bulatova 1981), and, secondly, genetic markers located on chromosome 3 and 5 were  
59 found to have sex-specific inheritance in the Raso lark (*Alanda razae*; Brooke et al. 2010).

60  
61 Here, we use comparative genomics to study this neo-sex chromosome system across three Alaudidae  
62 species – two *Alanda* species (Raso lark and Eurasian skylark *A. arvensis*) and one *Eremophila* species (horned  
63 lark) – and their sister species in the family Panuridae (the bearded reedling *Panurus biarmicus*). We use whole-  
64 genome sequence data of these species to characterise in detail which genomic regions have become fused  
65 to the sex chromosomes, and use phylogenetic information to determine the appearance and age of several  
66 evolutionary strata where recombination has been suppressed at different points in time (*sensu* Lahn & Page

67 1999). Then, we test whether the age of the strata explains the degree of Z-W divergence of gametologous  
68 genes, as predicted by sex chromosome theory (Rice 1994; Lahn & Page 1999). Next, we test the  
69 hypothesised importance of chromosome content for the formation of sex chromosomes by analysing  
70 whether the fused chromosomal regions are enriched for genes with sex-specific functions. Lastly, we  
71 evaluate signs of repeated sex chromosome evolution by searching for homologies between the fused sex  
72 chromosomes in larks and the sex chromosomes of other vertebrate lineages. Our study supports a key role  
73 of chromosome content in the evolution of sex chromosomes and highlights the importance of studying  
74 independently originated sex chromosomes for understanding how and why vertebrate sex chromosomes  
75 evolve.

## 76 2. MATERIALS & METHODS

### 77 2.1 Sequence data

78 We extracted DNA from blood samples using a phenol–chloroform protocol (Sambrook & W Russel, 2001)  
79 of one female and one male individual from each of our four study species: Raso lark (*Alauda razae*, from  
80 Cape Verde), Eurasian skylark (*A. arvensis cantarella*, from Italy), horned lark (*Eremophila alpestris flava*, from  
81 Sweden) and bearded reedling (*Panurus b. biarmicus*, from Sweden). According to *cytochrome b* sequence data,  
82 the two *Alauda* species diverged c. 6 million years ago (Mya), *Alauda* and *Eremophila* c. 14 Mya (Alström et  
83 al. 2013), and Alaudidae and Panuridae c. 17 Mya (Moyle et al. 2016). All samples were collected non-  
84 destructively and with permission from the relevant authorities (Direcção Geral do Ambiente, Cape Verde,  
85 and Malmö/Lund Ethical Committee for scientific work on animals, Sweden, no. 17277-18). DNA was  
86 sequenced with Illumina HiSeqX (150 bp, paired-end) by SciLifeLab Sweden.

## 87 2.2 *De novo* assembly and mapping

88 To obtain reference genomes, we created *de novo* genome assemblies from the male sequence data for each  
89 of the study species. The resequencing data was trimmed using nelson clip ([https://github.com/Victorian-](https://github.com/Victorian-Bioinformatics-Consortium/nesoni)  
90 [Bioinformatics-Consortium/nesoni](https://github.com/Victorian-Bioinformatics-Consortium/nesoni)) with a minimum read quality of 20 and minimum read length of 20 bp.  
91 The trimmed reads were then assembled with Spades v3.5.0 (Bankevich et al. 2012) using 5 different kmer  
92 lengths (21, 33, 55, 77 and 127) and the setting “careful”. Scaffolds shorter than 1 kbp were discarded.  
93 Quality statistics from the assemblies were calculated using Quast v4.5.4 (Gurevich et al. 2013). Assemblies  
94 with N50 over 50 kbp were kept for further analysis. This threshold meant keeping the assemblies of the  
95 Raso lark (N50=103 kbp, 28304 scaffolds) and the bearded reedling (N50=68 kbp, 36455 scaffolds), while  
96 the assemblies for the Eurasian skylark (N50=8 kbp, 256822 scaffolds) and horned lark (N50=22 kbp,  
97 109088 scaffolds) were discarded.

98

99 Reads from all of the samples (n = 8) were cleaned for adaptor sequences with Trimmomatic v.0.3.6 (Bolger  
100 et al. 2014) using the adaptor file TruSeq3-PE and options seedMismatches: 2, palindromeClipThreshold:  
101 30 and simpleClipThreshold: 10. Trimming of low-quality bases was done using a quality threshold of 15  
102 from the leading end and 30 from the trailing end. The reads were further trimmed for a minimum quality  
103 of 20 over sliding windows of 4 bp. Lastly, any reads shorter than 90 bp were excluded from further analyses.  
104 The number of remaining reads in our samples ranged from 176 to 404 million. The samples were quality  
105 checked using fastqc v0.11.7 (<https://www.bioinformatics.babraham.ac.uk/projects/fastqc/>).

106

107 The male and female samples of Raso lark and bearded reedling were aligned to their respective genome  
108 assemblies, while the Eurasian skylark and horned lark individuals were aligned to the genome assembly of  
109 their closest relative, the Raso lark. The alignment was done with bwa mem v0.7.17 (Li & Durbin 2009),  
110 marking shorter split hits as secondary (option -M) for downstream compatibility. The aligned reads were  
111 sorted with samtools v1.7 (Li et al. 2009), and duplicated reads were removed using picardtools v2.18.0  
112 (<http://broadinstitute.github.io/picard>). Assembly and alignment statistics are provided in Suppl. Tables  
113 S1,2.

## 114 2.3 Chromosome anchoring

115 The scaffolds in the genome assemblies were grouped into different chromosomes and ordered into  
116 chromosome-level using the genome assembly of the zebra finch (*Taeniopygia guttata*; (Warren et al. 2010).  
117 The zebra finch genome assembly tacGut.3.2.4 was downloaded from Ensembl (Cunningham et al. 2015)  
118 and transformed into a database using the last v876 (Kielbasa et al. 2011) program lastdb. The two genome  
119 assemblies, of the Raso lark and bearded reedling, were aligned to the zebra finch genome using the program  
120 lastal and converted to psl format using the script maf-convert, both from the same software suite last v876.  
121 From there, we extracted chromosome anchoring coordinates based on the longest match to the zebra finch  
122 genome for each 5 kbp window in the Raso lark and bearded reedling assemblies, with a minimum  
123 requirement of 500 matching base pairs per 5 kbp window. The assembly positions from the output files of  
124 the coverage and single nucleotide variant (SNV) analyses were then translated to the starting positions of  
125 the match to the zebra finch genome assembly (see section below).

126

## 127 2.4 Identification of sex-linked genomic regions

128 We identified sex-linked regions using two different kinds of genomic signatures: (i) differential mapping  
129 success in males and females (i.e. sex-specific genome coverage), and (ii) an excess or deficit of female-  
130 specific genetic variation. Sex chromosomes almost invariably evolve recombination suppression in the  
131 heterogametic sex so that regions that have been sex-linked for a long time (such as the sex chromosomes  
132 that formed in the ancestor of all birds) will show pronounced sequence divergence and degeneration in the  
133 non-recombining chromosome (the W in birds; Zhou et al. 2014). The regions belonging to the ancestral  
134 sex chromosomes can thus be identified by lower female coverage, and fewer female-specific genetic  
135 variants compared to males. This is because reads from the female-specific W-chromosome will either not  
136 map to the male reference genome due to substantial differentiation between the Z and W or because of  
137 deletions on the W chromosome. More-recently formed sex-linked regions may be identified by lower  
138 mapping success in females, although we expect a subtler difference as the W-linked genomic region may

139 not have yet developed substantial differentiation from the Z-linked homologous region. Here, we also  
140 expect a higher amount of female-specific mutations compared to males, due to differentiation between the  
141 Z and W sex chromosome copies.

142

143 To uncover differential mapping success in males and females for each species, we parsed the alignment  
144 files for reads with more than two mismatches and calculated genome-wide coverage for 5 kbp windows  
145 with bedtools v2.71.1 (Quinlan & Hall 2010). All genome coverage values were normalised between the  
146 female and the male sample, based on the number of reads in the trimmed and adaptor-free fastq files. To  
147 identify sex-linked regions, we binned the female-to-male coverage values for every 1 Mbp genomic region  
148 and extracted the mean value from each bin. Following discovery of sex-linked genomic regions, we  
149 performed another normalisation step by dividing the median female-to-male coverage ratio for each 5 kbp  
150 window by the genome-wide median female-to-male coverage ratio counting only chromosomes without  
151 sex-linked regions. We then binned the data into 0.1 Mbp windows and calculated the mean female-to-male  
152 coverage ratio within each bin.

153

154 To analyse female-specific variation, we called variants in the alignment files (with all mismatches allowed)  
155 with freebayes v1.1.0 for each species separately ( $n = 2$  in each analysis) using freebayes-parallel (Garrison  
156 & Marth 2012) and parallel v20180322 (Tange 2018). The output was then parsed for any SNP that had  
157 been marked with a flag other than PASS (--remove-filtered-all), a minimum quality of 20 and minimum  
158 depth of 3x using vcftools v0.1.15 (Danecek et al. 2011). Private alleles (minor alleles occurring only in one  
159 sample in a heterozygous state) were extracted with vcftools using option --singletons. We calculated the  
160 difference between the number of female-specific private alleles and male-specific private alleles for each 5  
161 kbp window and extracted the average difference across 1 Mbp and 0.1 Mbp windows.

## 162 2.5 Analysis of divergence between gametologous genes

163 We used the whole-genome synteny aligner program SatsumaSynteny v. 2.0 (Grabherr et al. 2010) to align  
164 the Raso lark assembly to the zebra finch assembly (taeGut.3.2.4), and then used kraken (Zamani et al. 2014,

165 downloaded 18 June 2018) to make a lift-over of the zebra finch annotations to the Raso lark assembly. Of  
166 the 18204 transcripts and 17488 genes in the zebra finch annotation, 14466 transcripts (79 %) from 13764  
167 genes (79 %) were annotated in the Raso lark. We used Freebayes v.1.1.0 (Garrison & Marth 2012) (--report-  
168 monomorphic) to call variants for every base pair within all exons in the Raso lark based on the genome  
169 coordinates from the lift-over.

170

171 We *in silico* extracted gametologous gene sequences from sex-linked regions using an in-house script (code  
172 provided as Supplementary Code S1; general methodology described in (Sigeman et al. 2018) based on the  
173 genotypes of the female and male samples. The script uses sex-specific genotype information to phase the  
174 data into a Z and W sequence. We replaced a site by “N” if it had a quality score or sequence depth below  
175 20 or if the genotype in either sample was not called. Any site without variants in either sample was extracted  
176 as such, and remaining variants between the male and female were phased based on sex-specific allele  
177 compositions provided in Suppl. Table S3.

178

179 To confirm that both Z and W gametologs were present in the data, we calculated genome coverage values  
180 for every exon using bedtools v.2.27.1 multicov (Quinlan & Hall 2010) and normalised the values between  
181 the two samples of each species. Exons with female coverage less than 75 % of the male sample were  
182 masked with N:s, as this suggests absence of a W gametolog.

183

184 We used TransDecoder v3.0.1 (<https://github.com/TransDecoder/TransDecoder/>) to find the longest  
185 open reading frames for each of the sequences (--retain\_pfam\_hits, --retain\_blastp\_hits, --single-best-orf).  
186 Orthologous genes from the zebra finch, collared flycatcher (*Ficedula albicollis*) and chicken (*Gallus gallus*)  
187 were downloaded through BioMart (database: Ensembl Genes 93), and the longest transcript from the  
188 flycatcher and chicken corresponding to the zebra finch transcripts in the annotation was added as additional  
189 sequences. These gene sequences were not used in further analyses but aided in evaluating the quality of the  
190 alignments. The sequences were codon-aware aligned using *Prank* v.150803 (Loytynoja 2014). Each N in  
191 the sequences was transformed into “-”, and all sites including this character in any sequence were then



192 removed using gblocks v0.91b (Castresana 2000) . We calculated pairwise substitution rates between Z–W  
193 gametologs using codeml (estimated kappa and codon frequency F3X4) from the PAML v4.9 package (Yang  
194 2007). Gene sequences longer than 500 bp, and where the Z and W sequences within a species had a  
195 synonymous substitution rate (dS) value above 0.01, were kept for further analysis. We used Kruskal-Wallis  
196 tests to investigate potential differences in sequence divergence between the identified sex-linked genomic  
197 regions (or strata, see below) as the data were not normally distributed. All values were  $\log_2$ -transformed  
198 prior to these tests to fulfil the criteria of similar distributions between groups and a low number (0.00001)  
199 was added to all synonymous substitution rate (dN) values as some contained zeros. Significance levels of  
200 differences between groups were calculated using pairwise Wilcoxon tests with Benjamini & Hochberg  
201 adjusted p values. Furthermore, we used ordered heterogeneity tests (OH; Rice & Gaines 1994) to evaluate  
202 if the difference between Z–W nucleotide divergences between groups correlated with relative timing of  
203 sex-linkage between the evolutionary strata. The OH value  $r_{spe}$  was calculated by multiplying the  
204 complement of the p value from the Kruskal-Wallis tests ( $1 - p$  value) with the Spearman Rank rho value  
205 from the median nucleotide divergence estimates for each stratum correlated with the order in which they  
206 appear based on the phylogeny of the studied species. The relative timing of sex-linkage of stratum 5a and  
207 5b (see below) could not be distinguished using our data and were thus given the same rank. P values were  
208 extracted from the supplied figures in Rice & Gaines (1994), and multiplied by two for two-tailed hypothesis  
209 testing.

## 210 2.6 Gene enrichment analysis

211 We downloaded Gene Ontology (GO) annotations for all the genes in the zebra finch genome from  
212 Ensembl BioMart (taeGut3.2.4; accessed on 12 September 2018) and parsed the file for GO term names  
213 with the following pattern matches: “sperm”, “ovarian”, “gonad”, “estrogen”, “testosterone”, “sex  
214 differentiation”, “sex determination”, “sexual characteristics”, “sexual reproduction” and “oogenesis”. The  
215 zebra finch gene annotation had in total 323 genes matching to any of these patterns. We then counted the  
216 number of genes matching any of these terms for i) the sex-linked region for each chromosome separately,  
217 and ii) within each of the identified evolutionary strata (see below). We performed two-tailed binomial tests

218 to see if these genomic regions contained either more or fewer sex-related genes than would be expected if  
219 the genes were randomly distributed across the genome. We calculated the proportion of the genome that  
220 made up each studied sex-linked region (1.253 Gbp is the full genome size of the zebra finch genome  
221 assembly used) and tested if the region contained a higher or lower proportion of sex-related genes than  
222 would be expected based on this probability. The p values for the two categories of tests (i, ii) were adjusted  
223 using the Benjamini & Hochberg method.

## 224 3. RESULTS

### 225 3.1 Identification of sex-linked genomic regions

226 A genome-wide scan for sex-specific genetic variation (measured as the average difference in number of  
227 female and male private SNVs per Mbp), and sex-specific genome coverage (measured as the average  
228 female-to-male read coverage ratio per Mbp), revealed that four chromosomes stood out from the  
229 autosomal pattern across the species (Figure 1; Suppl. Table S4). First, the ancestral Z chromosome showed  
230 substantially lower female coverage, and no or a moderately lower amount of female-specific genetic  
231 variation, in all four species (Figure 1). Secondly, the first half of chromosome 4A showed substantially  
232 higher number of female-specific SNVs and moderately lower female coverage in all species. Thirdly, a  
233 substantially higher amount of female-specific SNVs and no or moderate sex-specific coverage were found  
234 over varying extents of chromosome 3 and 5 in the four species – small parts of chromosome 3 in the  
235 bearded reedling, slightly larger parts of chromosome 3 in the horned lark, and the greater part of  
236 chromosome 3 and 5 in the Raso lark and the Eurasian skylark (Figure 1). These results support the existence  
237 of multiple autosome–sex chromosome fusions and several evolutionary strata where recombination has  
238 been suppressed at different points in time across the avian and the lark phylogeny.  
239

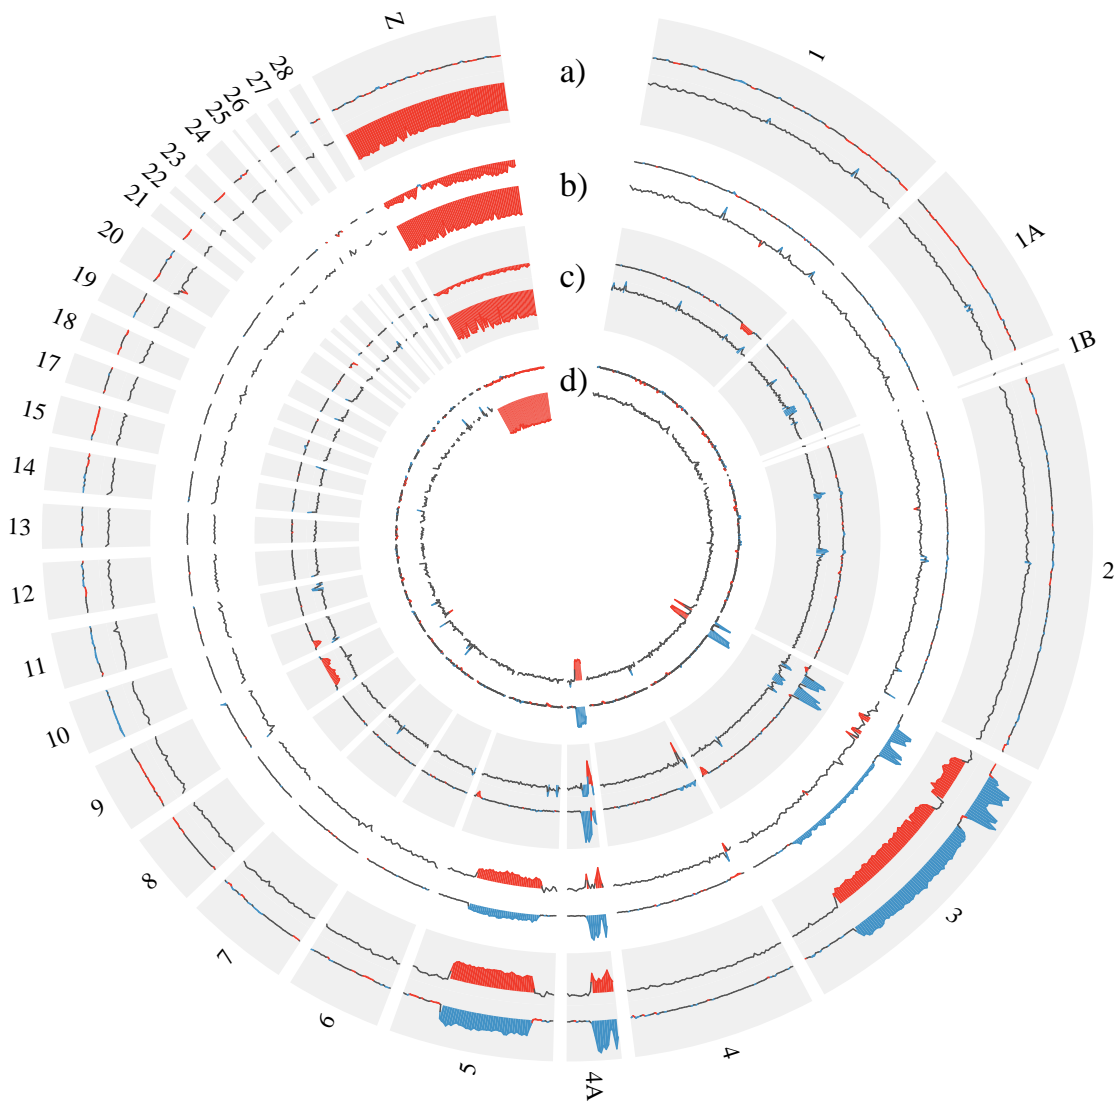

240

241 Figure 1. Genome-wide distribution of female-to-male difference in number of private single nucleotide variants  
242 (SNVs), and female-to-male coverage ratio, in the four study species. The background colours grey and white separate  
243 the data for each of the four species which are shown in the following order starting from the outer ring: a) Raso lark,  
244 b) Eurasian skylark, c) horned lark and d) bearded reedling. Within each ring, the outer line shows the average  
245 difference in number of private SNVs between females and males across 1 Mbp windows (with values > 500 in blue  
246 and values < -500 in red), and the inner line shows the average female-to-male coverage ratio across 1 Mbp windows  
247 (with values > 1.1 in blue and values < 0.9 in red). Chromosome-wide averages are provided in Suppl. Table S4.

248 To define the evolutionary strata more precisely, and to estimate their age, we assessed (i) the genomic  
249 signatures of sex-linkage (i.e., sex-specific genetic variation and genome coverage as above) at the scale of

250 0.1 Mbp regions in each species (Table 1; Suppl. Figure S1), and (ii) the most parsimonious order of  
251 emergence based on dated phylogenies (Figure 2; Alström et al. 2013, Cortez et al. 2014, Moyle et al. 2016).  
252 Stratum 1 corresponds to the entire ancestral Z chromosome (72.9 Mbp), which was formed c. 140 Myr  
253 ago (Cortez et al. 2014), and stratum 2 corresponds to the previously known Sylvioidea neo-sex  
254 chromosome, i.e. the first 9.6 Mbp of chromosome 4A (Pala et al. 2012), which was formed c. 21-19 Myr  
255 ago when Sylvioidea split from other passerines (Moyle et al. 2016). For both these strata, all four study  
256 species showed clear signatures of sex-linkage (Table 1; Suppl. Figure S1). Likewise, all four study species  
257 showed sex-specific genetic variation and coverage in the regions between 8.4–10.4 and 18.1–24.1 Mbp on  
258 chromosome 3 (with a total size of 8.0 Mbp): this constitutes stratum 3, which is the earliest stratum being  
259 unique to the Alaudidae/Panuridae clade. The age of stratum 3 is defined by the split of  
260 Alaudidae/Panuridae from other Sylvioidea families c. 19-17 Myr ago (Moyle et al. 2016). The next stratum,  
261 stratum 4, has a size of 3.6 Mbp and spans the region between 10.4–14.0 Mbp on chromosome 3. It occurs  
262 in all three lark species, but not in the bearded reedling, which gives an estimated age of c. 17-14 Myr as  
263 defined by the split between Alaudidae and Panuridae (Alström et al. 2013). Finally, the Raso lark and the  
264 Eurasian skylark had two additional strata on chromosome 3 (stratum 5a: 64.9 Mbp spanning the regions  
265 between 5.8–8.4, 14.0-18.1 and 29.8-88.0 Mbp) and chromosome 5 (stratum 5b: 36.3 Mbp, the region  
266 between 9.1-45.4 Mbp), respectively, that were not shared with the other two species. These strata form the  
267 youngest sex chromosome layer, estimated to be c. 14-6 Myr based on the split between the horned lark  
268 and the *Alauda* larks (Alström et al. 2013). Together, these sex-specific regions on chromosome Z, 4A, 3  
269 and 5 amounts to 195.3 Mbp of the genome of the Raso lark and Eurasian skylark (16.3% of the genome  
270 based on a genome size estimation of 1.2 Gbp) (Table 1; Suppl. Figure S1). The horned lark had 94.1 Mbp  
271 (7.8%), and the bearded reedling 90.5 Mbp (7.5%), sex-linked genomic material (Table 1; Suppl. Figure S1).  
272 Figure 2a shows a summary of the chromosomal position of the evolutionary strata and their most  
273 parsimonious order of appearance based on presence and absence in the studied species (also shown are  
274 silhouettes indicating vertebrate groups where homologs to these chromosomes act as sex chromosomes;  
275 see Discussion). Figure 2b summarises the timings of sex-linkage based on dated phylogenies (Cortez et al.  
276 2014, Alström et al. 2013, Moyle et al. 2016).

277

278 Table 1. Sex-linked regions in each of the four species. The strata are numbered according to the most parsimonious  
 279 order of emergence based on phylogenetic analyses. Stratum 1 (homologous to chromosome Z in zebra finch) acts as  
 280 the sex chromosome in all birds, and sex-linkage of stratum 2 (chromosome 4A in zebra finch) is common for all birds  
 281 belonging to the superfamily Sylvioidea, which includes larks and the bearded reedling. Stratum 3 was seen to be sex-  
 282 linked in all four studied species and is therefore older than stratum 4, which appears as sex-linked in all larks but not  
 283 the bearded reedling. Stratum 5a and 5b appear as sex-linked in the Raso lark and Eurasian skylark, but not in horned  
 284 lark or bearded reedling, and is therefore the youngest stratum but here divided into two substrata as they originated  
 285 from different autosomes. The table provides mean values for the male-to-female coverage ratio (coverage) and female-  
 286 to-male difference in number of private SNVs across 0.1 Mbp windows for each stratum. Bearded reedling and horned  
 287 lark have no sex-linkage for stratum 5a and 5b, and bearded reedling not for stratum 4, and are therefore marked with  
 288 NA in addition to the corresponding values.

| Stratum | Chromosome | Genomic region (Mbp)                | Stratum Size (Mbp) |          | Raso lark | Eurasian skylark | Horned lark | Bearded reedling |
|---------|------------|-------------------------------------|--------------------|----------|-----------|------------------|-------------|------------------|
| 1       | Z          | 0-72.9                              | 72.9               | Coverage | 0.52      | 0.55             | 0.54        | 0.52             |
|         |            |                                     |                    | SNV      | -17.77    | -992.10          | -375.85     | -160.48          |
| 2       | 4A         | 0-9.6                               | 9.6                | Coverage | 0.73      | 0.89             | 1.06        | 0.66             |
|         |            |                                     |                    | SNV      | 2957.35   | 2227.36          | 2518.46     | 2413.16          |
| 3       | 3          | 8.4-10.4,<br>18.1-24.1              | 8.0                | Coverage | 0.74      | 0.95             | 1.20        | 0.68             |
|         |            |                                     |                    | SNV      | 3386.68   | 2435.65          | 3404.79     | 2787.17          |
| 4       | 3          | 10.4-14.0                           | 3.6                | Coverage | 0.69      | 0.84             | 0.97        | NA (1.00)        |
|         |            |                                     |                    | SNV      | 3019.06   | 2161.91          | 2512.71     | NA (-10.54)      |
| 5a      | 3          | 5.8-8.4,<br>14.0-18.1,<br>29.8-88.0 | 64.9               | Coverage | 0.74      | 0.98             | NA (1.00)   | NA (0.99)        |
|         |            |                                     |                    | SNV      | 1785.39   | 451.48           | NA (1.73)   | NA (1.77)        |
| 5b      | 5          | 9.1-45.4                            | 36.3               | Coverage | 0.69      | 0.85             | NA (1.00)   | NA (0.99)        |
|         |            |                                     |                    | SNV      | 1952.04   | 879.14           | NA (20.19)  | NA (-37.92)      |

289

290

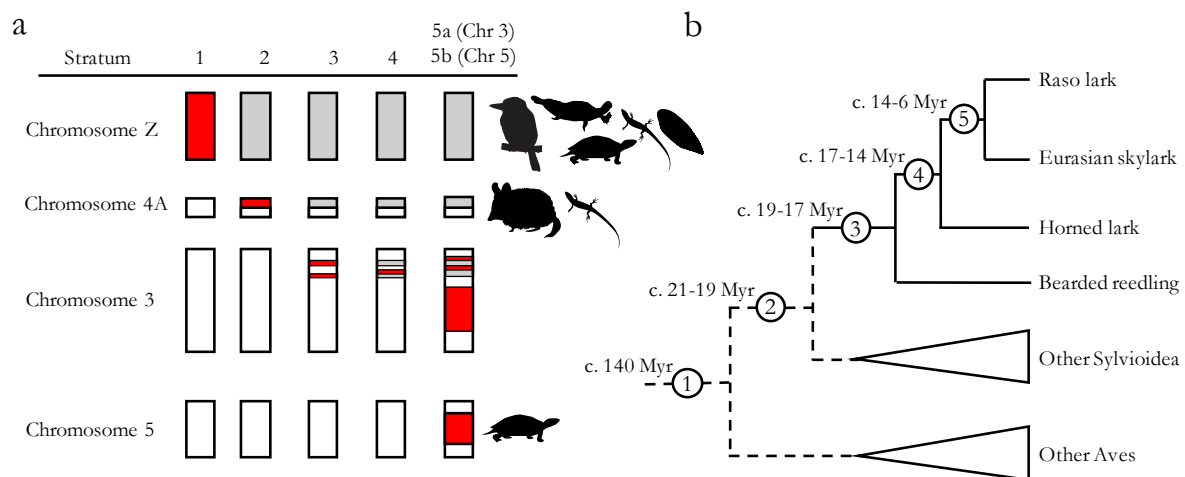

291

292 Figure 2. a) Cartoon representation of the evolutionary strata in the most parsimonious order of appearance (starting  
 293 with stratum 1 and ending with stratum 5a and 5b). White colour represents autosomal regions and red colour marks  
 294 the stratum being added. Grey colour represents sex-linked regions that already exist at the timing of the new stratum.  
 295 Silhouettes indicate vertebrate groups where homologs to these chromosomes act as sex chromosomes (see  
 296 Discussion): chromosome Z acts as the sex chromosome in all birds (Smith et al. 2009) and its homolog acts as sex  
 297 chromosome in a flatfish (*Cynoglossus semilaevis*; Chen et al. 2014), a turtle (*Staurotypus triporcatus*; Montiel et al. 2016), a  
 298 gekko (*Gekko bokouensis*; Kawai et al. 2008) and in the platypus (*Ornithorhynchus anatinus*; Grützner et al. 2004); the  
 299 homolog of chromosome 4A is the sex chromosome in a lizard (*Takydromus sexlineatus*; Rovatsos et al. 2016) and in all  
 300 eutherian mammals (Ross et al. 2005); and the homolog of chromosome 5 acts as sex chromosome in two turtle groups  
 301 (*Glyptemys* wood turtles and *Siebenrockiella* marsh turtles; Montiel et al. 2016). (b) A cladogram showing when in time  
 302 (Myr) the evolutionary strata were formed. The dating of stratum 1 is based on analyses of gametologous gene pairs in  
 303 Cortez et al. (2014), stratum 2 and 3 on speciation estimates in Moyle et al. (2016), and stratum 4 and 5 (5a and 5b) on  
 304 speciation estimates in Alström et al. (2013).

### 305 3.2 Analysis of divergence between gametologous genes

306 We analysed the Z–W divergence from the gametologous genes located on the different strata across the  
 307 sex chromosome in the Raso lark and the Eurasian skylark, i.e. the species with all five evolutionary strata.  
 308 We analysed the two different parts of stratum 5 on chromosome 3 and 5 separately in these analyses (i.e.,  
 309 stratum 5a and 5b, respectively). The degree of synonymous substitutions (median dS) between the Z and

310 W gametologs ranged from 0.22 at stratum 1 to 0.02 at stratum 5a and 5b in the Raso lark, and from 0.21  
 311 at stratum 1 to 0.02 at stratum 5a and 5b in the Eurasian skylark (Figure 3, Suppl. Table S5). In the Raso  
 312 lark, the log<sub>2</sub>-transformed dS values differed significantly between all strata except between stratum 2 and  
 313 stratum 3, and between stratum 5a and 5b (Kruskal-Wallis rank sum test: chi-squared = 154.0, df = 4, p <  
 314 0.001; for pairwise comparison values see Suppl. Table S6). In the Eurasian skylark, the log<sub>2</sub>-transformed  
 315 dS differed significantly between all strata, except between stratum 5a and 5b (Kruskal-Wallis rank sum test:  
 316 chi-squared = 143.0, df = 4, p < 0.001; pairwise comparison values in Suppl. Table S6). The degree of non-  
 317 synonymous substitutions (dN) between the Z and W gametologs showed similar patterns, but less  
 318 pronounced (median dN ranged from 0.03 at stratum 1 to 0.002 at stratum 5a in the Raso lark, and from  
 319 0.03 at stratum 1 to 0.002 at stratum 5a in the Eurasian skylark; Figure 3, Suppl. Table S5). The dN values  
 320 were significantly different between stratum 5a and all other strata, and between 5b and all other strata in  
 321 both species, and between stratum 1 and stratum 4 in the Raso lark (Raso lark: chi-squared = 88.7, df = 4,  
 322 p < 0.001; Eurasian skylark: chi-squared = 143.0, df = 4, p < 0.001; for pairwise comparison values see  
 323 Suppl. Table S6). The dN/dS values were lowest at stratum 1 in both species (0.082 in the Eurasian skylark  
 324 and 0.097 in the Raso lark) and highest at stratum 4 (0.196 in the Eurasian skylark and 0.294 in the Raso  
 325 lark). The dN/dS values in stratum 4 differed significantly from strata 1, 2 and 5a, and stratum 5a differed  
 326 significantly from stratum 5b, in both species (Raso lark: chi-squared = 17.7, df = 4, p = 0.001; Eurasian  
 327 skylark: chi-squared = 14.0, df = 4, p = 0.007; pairwise comparisons in Suppl. Table S6).

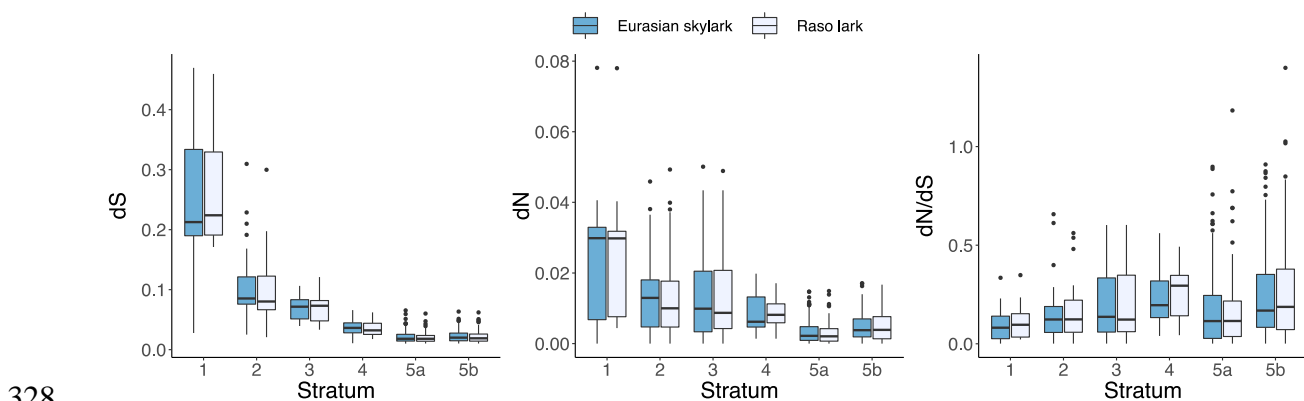

329 Figure 3. Z-to-W substitution rates for gametologous genes positioned within the different evolutionary strata in the  
 330 Eurasian skylark (dark blue) and the Raso lark (light blue). (a) Median dS values, (b) median dN values, and (c) median

331 dN/dS values are marked by the black line in each box, and the upper and lower hinges correspond to the first and  
332 third quartiles (the 25 and 75 percentiles). The whiskers extend to no more than  $1.5\times$  the interquartile range from  
333 each hinge. See Suppl. Table S5 for details and main text for results from analyses of variances between strata based  
334 on  $\log_2$ -transformed values.

335

336 In both Raso larks and Eurasian skylarks, the dS values correlated significantly with the relative age of the  
337 strata (stratum 1 being oldest and strata 5a and 5b being youngest) (Ordered-heterogeneity test:  $r_sP_c = 0.99$ ,  
338  $k = 6$ ,  $p < 0.001$  for both species). This was also true for the dN values ( $r_sP_c = 0.99$ ,  $k = 6$ ,  $p < 0.001$  for  
339 both species). However, the dN/dS values were not significantly associated with the age of the strata (Raso  
340 lark:  $r_sP_c = 0.41$ ,  $k = 6$ ,  $p \sim 0.11$ ; Eurasian skylark:  $r_sP_c = 0.46$ ,  $k = 6$ ,  $p \sim 0.11$ ).

### 341 3.3 Gene enrichment analysis

342 Of the 323 genes with sex-related GO term names (see Methods section), 16 genes were located on the  
343 ancestral avian sex chromosome Z (stratum 1), 5 within the sex-linked part of chromosome 4A (stratum 2),  
344 33 within the sex-linked region of chromosome 3 (strata 3, 4 and 5a) and 5 within the sex-linked part of  
345 chromosome 5 (stratum 5b) (Figure 4a; Suppl. Table S7). The different strata on chromosome 3 hold 5  
346 (stratum 3), 0 (stratum 4) and 28 (stratum 5a) genes, respectively (Figure 4b; Suppl. Table S7). This means  
347 that 59 genes with these hypothesised sex-related functions are sex-linked in the Raso lark and in the  
348 Eurasian skylark, i.e. the species with all strata, compared to 16 in species only having the ancestral avian  
349 sex chromosome.

350

351 Binomial tests showed that the sex-linked part of chromosome 3 (strata 3, 4 and 5a) had significantly more  
352 sex-related genes than would be expected if the genes were randomly distributed over the genome (33  
353 observed genes compared to 19.7 expected genes; Binomial test: adjusted  $p = 0.019$ ; Figure 4a; Suppl. Table  
354 S7). The sex-linked regions on chromosomes Z, 4A and 5 showed no statistical difference between observed  
355 and expected number of genes (NS; Suppl. Table S7). When analysing each stratum separately, stratum 5a



356 was also significantly enriched for sex-related genes (28 observed genes compared to 16.7 expected genes;  
357 adjusted  $p = 0.047$ ; Figure 4b; Suppl. Table S7), while the other strata were not significantly enriched (NS;  
358 Suppl. Table S7). Information about the analysed genes (chromosomal positions, GO terms and gene ID)  
359 are provided in Supplementary Document S1.  
360

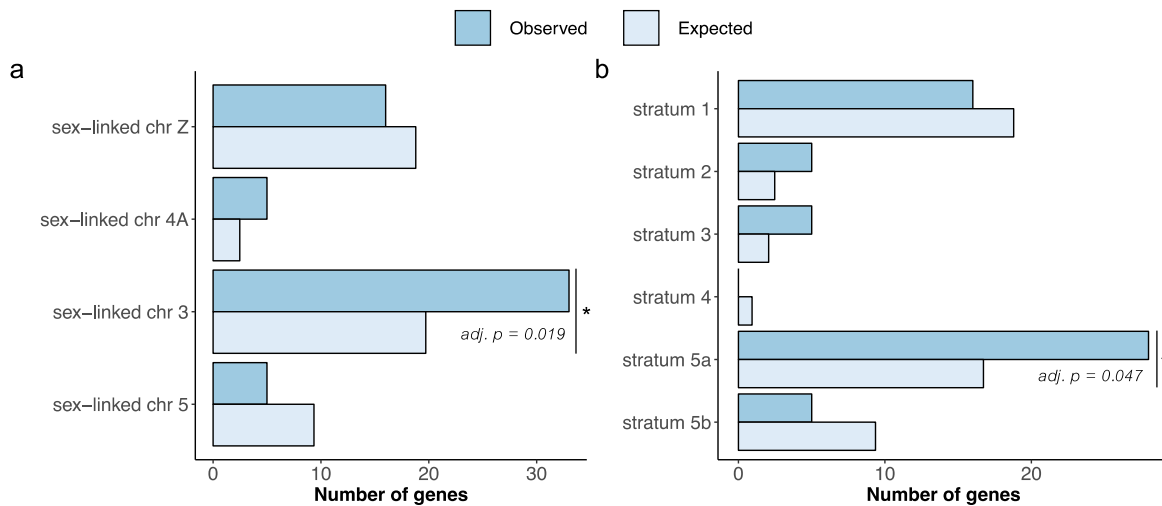

361  
362 Figure 4. Observed and expected number of sex-related genes for (a) the sex-linked region of each chromosome and  
363 (b) each stratum. Binomial tests (Suppl. Table S7) showed that the sex-linked region on chromosome 3 had significantly  
364 more sex-related genes than would be expected if the genes were randomly distributed throughout the genome  
365 (adjusted  $p = 0.019$ ), and that this enrichment on chromosome 3 was mainly due to a high number of sex-related genes  
366 on stratum 5a (adjusted  $p = 0.047$ ).

## 367 4. DISCUSSION

368 By using comparative genomics in larks and their closest relative, the bearded reedling, we have identified  
369 the precise genomic regions that have evolved sex-linkage across a group of birds with multiple autosome–  
370 sex chromosome fusions. The extent of sex-linkage varied between species, and for two of them (Raso lark  
371 and Eurasian skylark in the genus *Alauda*), we detected the largest known avian sex chromosome (195.3  
372 Mbp) and show that it originates from fusions between (parts of) four avian chromosomes (Z, 3, 4A and  
373 5). We found evidence of five evolutionary strata where recombination has been suppressed at different

374 time points; from c. 140 Myr ago (stratum 1, the sex chromosome common to all birds) to c. 14-6 Myr ago  
375 (stratum 5a and 5b, the layer unique to *Alauda*; the strata and their age estimates are summarised in Figure  
376 2). We further show that the substitution rates between Z and W gametologs increase with increasing age  
377 of the strata. This gives support for a key prediction from sex chromosome theory: continuous  
378 differentiation of non-recombining chromosomes (Rice 1994; Lahn & Page 1999).

379  
380 With the available genomic data, we are not able to determine the chromosomal structure of this neo-sex  
381 chromosome. However, the 195.3 Mbp sex-linked region in the two *Alauda* study species (Raso lark and  
382 Eurasian skylark) constitutes c. 16.3% of their expected genome size (1.2 Gbp), which in turn corresponds  
383 well to the genomic proportion of the sex chromosomes in the karyotypes of the bimaculated lark (i.e., c.  
384 15-20%; Bulatova 1981). The bimaculated lark karyotypes further show that the Z and W chromosomes are  
385 of similar size and drastically enlarged compared to the usual bird karyotype (Bulatova 1981). Therefore, we  
386 believe that the additional chromosomes that are sex-linked in larks have fused to the Z as well as the W  
387 chromosome. Moreover, the karyotype of a male horned lark (no female was karyotyped) indicates a Z  
388 chromosome of similar size to that of the bimaculated lark (Bulatova 1981). Therefore, it is possible that  
389 large parts of chromosome 3 and 5 are fused to the Z chromosome also in the horned lark, but as our results  
390 show are still recombining in that species (with the exception of strata 3 and 4 on chromosome 3 that are  
391 non-recombining). This reasoning is complemented by the results in E. Dierickx et al. (unpublished  
392 manuscript) showing that different species and subspecies of *Alauda* (the oriental skylark *A. gulgula*, Eurasian  
393 skylark ssp. [possibly *A. a. arvensis/dulcivox/intermedia*], and Raso lark), and a species of the genus *Gallerida*  
394 (the crested lark *G. cristata*) – the sister genus of *Alauda* – have suppressed recombination on chromosome  
395 5 (stratum 5b) but show recombination suppression to different degrees on chromosome 3 (stratum 5a).

396  
397 A long-standing hypothesis in sex chromosome research posits that the evolutionary dynamics of sex  
398 chromosomes are governed by selection acting on linked genes, in particular on sex-determining and  
399 sexually antagonistic genes (Haldane 1922; Fisher 1931; Lewis & John 1968; D. Charlesworth & B.  
400 Charlesworth 1980). This hypothesis states that chromosomes that harbour such genes should be over-

401 represented in sex chromosome formations, transitions and turnovers (Bachtrog et al. 2011; Ross et al. 2009;  
402 O'Meally et al. 2012). In support of this hypothesis, we found that the sex-linked region of chromosome 3,  
403 and one of the strata on that chromosome (stratum 5a), were significantly enriched for genes with sex-  
404 related functions (adjusted  $p = 0.019$  and  $0.047$ , respectively). Among these genes is *ESR1* (*Estrogen receptor*  
405 *1*), which has been suggested to be involved in sex reversal in the American alligator (*Alligator mississippiensis*;  
406 Kohno et al. 2015). The other chromosomes (and strata) involved in the extensive neo-sex chromosome  
407 formation in larks were not significant enriched for sex-related genes. However, all of them have  
408 independently been recruited as sex chromosomes in other vertebrate lineages. The Z chromosome – the  
409 sex chromosome in all birds, containing the putative sex determining gene *DMRT1* (*Doublesex and mab-3*  
410 *related transcription factor 1*; Smith et al. 2009) – has independently been recruited as a sex chromosome in a  
411 flatfish (the half-smooth tongue sole *Cynoglossus semilaevis*; Chen et al. 2014), a turtle (the Mexican musk turtle  
412 *Staurotypus triporcatus*; Montiel et al. 2016), a gecko (the Kwangsi gecko *Gekko bokouensis*; Kawai et al. 2008),  
413 and in the platypus (*Ornithorhynchus anatinus*; Grützner et al. 2004). Chromosome 4A is homologous to the  
414 sex chromosome in a lizard (the Asian grass lizard *Takydromus sexlineatus*; Rovatsos et al. 2016) and in all  
415 eutherian mammals (Ross et al. 2005), and contains several interesting genes, including *AR* (*Androgen receptor*)  
416 and *SOX3* (*SRY-related HMG-box 3*) (note, however, that *SOX3* is not sex-linked in Sylvioidea; Pala, Naurin,  
417 et al. 2012; this study). Finally, the homolog to chromosome 5 acts as sex chromosome in two turtle groups  
418 (*Glyptemys insculpta* and *Siebenrockiella crassicollis*; Montiel et al. 2016). An alternative hypothesis is that fusions  
419 may become fixed as a consequence of non-selective processes (see e.g. Pennell et al. 2015). However, we  
420 have presented several strands of evidence – the enrichment of genes with sex-specific function and the  
421 repeated homology to other vertebrate sex chromosomes – to support the hypothesis that the multiple  
422 fusion events between chromosome Z, 4A, 3 and 5, that have formed these extraordinary neo-sex  
423 chromosomes in larks and in the bearded reedling, have been driven by selective processes acting on their  
424 gene content. This adds to the accumulating evidences that specific chromosomes are non-randomly  
425 recruited as sex chromosomes in vertebrates (O'Meally et al. 2012; Ezaz et al. 2006; Ezaz et al. 2016).  
426

427 Multiple autosome–sex chromosome fusions have also occurred in other clades, including gazelles and  
428 snakes (Vassart et al. 1995; Pokorná et al. 2014). In snakes, all six neo-sex chromosome systems identified  
429 so far are from a single family, Elapidae (Pokorná et al. 2014). These patterns, now also including those  
430 found in the larks, hint at a phylogenetic component in neo-sex chromosome formation; that once an  
431 autosome–sex chromosome fusion has occurred, additional ones may be expected (Pokorná et al. 2014). If  
432 the fusions are being selected for because of any advantageous linkage that they may create, then previously  
433 fused regions (with already suppressed recombination) provide more opportunities for beneficial linkage to  
434 be formed between the sex-linked genes and new additional genomic regions.

435

## 436 Acknowledgements

437 We wish to thank O. Berglund, P. Zehindjiev and S. Bensch for providing DNA of our study species.  
438 Sequencing was performed by the SNP&SEQ Technology Platform in Uppsala, which is part of the  
439 National Genomics Infrastructure (NGI) Sweden and Science for Life Laboratory, supported by the  
440 Swedish Research Council and the Knut and Alice Wallenberg Foundation. Bioinformatics analyses were  
441 performed on resources provided by the Swedish National Infrastructure for Computing (SNIC) at Uppsala  
442 Multidisciplinary Center for Advanced Computational Science (UPPMAX). The research was funded by  
443 research grants from the Swedish Research Council (to BH: 621-2014-5222 and 621-2016-689), the Royal  
444 Physiological Society in Lund (the Nilsson-Ehle Foundation), the Erik Philip-Sörensens Foundation, the  
445 Stiftelsen Olle Engkvist and the Wenner-Gren Foundations (to SP).

446

## 447 Supplementary Material and Data Availability

448 Suppl. Figure S1 and Suppl. Tables S1-7 are provided together as a separate file. Suppl. Document S1 is  
449 provided as a separate file. In-house scripts are given in Suppl. Code S1 (available upon request). Illumina

450 HiSeqX raw reads (150 bp, paired-end) will be deposited at NCBI sequence read archives upon  
451 acceptance.

## 452 References

- 453 Alström, P. et al., 2013. Multilocus phylogeny of the avian family Alaudidae (larks) reveals complex  
454 morphological evolution, non-monophyletic genera and hidden species diversity. *Molecular Phylogenetics*  
455 *and Evolution*, 69(3), pp.1043–1056.
- 456 Bachtrog, D. et al., 2011. Are all sex chromosomes created equal? *Trends in genetics: TIG*, 27(9), pp.350–357.  
457 Available at: <http://dx.doi.org/10.1016/j.tig.2011.05.005>.
- 458 Bankevich, A. et al., 2012. SPAdes: a new genome assembly algorithm and its applications to single-cell  
459 sequencing. *Journal of computational biology: a journal of computational molecular cell biology*, 19(5), pp.455–477.
- 460 Bolger, A.M., Lohse, M. & Usadel, B., 2014. Trimmomatic: a flexible trimmer for Illumina sequence data.  
461 *Bioinformatics*, 30(15), pp.2114–2120.
- 462 Brooke, M. de L. et al., 2010. Widespread translocation from autosomes to sex chromosomes preserves  
463 genetic variability in an endangered lark. *Journal of Molecular Evolution*, 70(3), pp.242–246.
- 464 Bulatova, N.S., 1981. A comparative karyological study of passerine bird.
- 465 Castresana, J., 2000. Selection of conserved blocks from multiple alignments for their use in phylogenetic  
466 analysis. *Molecular Biology and Evolution*, 17(4), pp.540–552.
- 467 Charlesworth, D. & Charlesworth, B., 1980. Sex differences in fitness and selection for centric fusions  
468 between sex-chromosomes and autosomes. *Genetical research*, 35(2), pp.205–214. Available at:  
469 <http://www.ncbi.nlm.nih.gov/pubmed/6930353>.
- 470 Chen, S. et al., 2014. Whole-genome sequence of a flatfish provides insights into ZW sex chromosome  
471 evolution and adaptation to a benthic lifestyle. *Nature Genetics*, 46(3), pp.253–260. Available at:  
472 <http://www.ncbi.nlm.nih.gov/pubmed/24487278>.
- 473 Cortez, D. et al., 2014. Origins and functional evolution of Y chromosomes across mammals. *Nature*,  
474 508(7497), pp.488–493. Available at: <http://www.ncbi.nlm.nih.gov/pubmed/24759410>.
- 475 Cunningham, F. et al., 2015. Ensembl 2015. *Nucleic Acids Research*, 43, pp.D662–9. Available at:  
476 <http://www.pubmedcentral.nih.gov/articlerender.fcgi?artid=PMC4383879>.
- 477 Danecek, P. et al., 2011. The variant call format and VCFtools. *Bioinformatics*, 27(15), pp.2156–2158.
- 478 Ellegren, H., 2010. Evolutionary stasis: the stable chromosomes of birds. *Trends in Ecology & Evolution*,  
479 25(5), pp.283–291.
- 480 Ezaz, T. et al., 2006. Relationships between Vertebrate ZW and XY Sex Chromosome Systems. *Current*  
481 *biology: CB*, 16(17), pp.R736–R743.
- 482 Ezaz, T., Srikulnath, K. & Graves, J.A.M., 2016. Origin of Amniote Sex Chromosomes: An Ancestral  
483 Super-Sex Chromosome, or Common Requirements? *Journal of Heredity*, 108(1), pp.94–105.

- 484 Fisher, R.A., 1931. THE EVOLUTION OF DOMINANCE. *Biological Reviews*, 6(4), pp.345–368.  
485 Available at: <http://doi.wiley.com/10.1111/j.1469-185X.1931.tb01030.x>.
- 486 Garrison, E. & Marth, G., 2012. Haplotype-based variant detection from short-read sequencing. *arxiv.org*.
- 487 Grabherr, M.G. et al., 2010. Genome-wide synteny through highly sensitive sequence alignment: Satsuma.  
488 *Bioinformatics*, 26(9), pp.1145–1151.
- 489 Grützner, F. et al., 2004. In the platypus a meiotic chain of ten sex chromosomes shares genes with the  
490 bird Z and mammal X chromosomes. *Nature*, 432(7019), pp.913–917.
- 491 Gurevich, A. et al., 2013. QUAST: quality assessment tool for genome assemblies. *Bioinformatics*, 29(8),  
492 pp.1072–1075.
- 493 Haldane, J.B.S., 1922. Sex ratio and unisexual sterility in hybrid animals. *Journal of Genetics*, 12(2), pp.101–  
494 109.
- 495 Kawai, A. et al., 2008. The ZW sex chromosomes of *Gekko bokouensis* (Gekkonidae, Squamata) represent  
496 highly conserved homology with those of avian species. *Chromosoma*, 118(1), pp.43–51.
- 497 Kielbasa, S.M. et al., 2011. Adaptive seeds tame genomic sequence comparison. *Genome Research*, 21(3),  
498 pp.487–493.
- 499 Kitano, J. & Peichel, C.L., 2011. Turnover of sex chromosomes and speciation in fishes. *Environmental*  
500 *Biology of Fishes*, 94(3), pp.549–558.
- 501 Kitano, J. et al., 2009. A role for a neo-sex chromosome in stickleback speciation. *Nature*, 461(7267),  
502 pp.1079–1083.
- 503 Kohno, S. et al., 2015. Estrogen Receptor 1 (ESR1; ER $\alpha$ ), not ESR2 (ER $\beta$ ), Modulates Estrogen-Induced  
504 Sex Reversal in the American Alligator, a Species With Temperature-Dependent Sex Determination.  
505 *Endocrinology*, 156(5), pp.1887–1899.
- 506 Lahn, B.T. & Page, D.C., 1999. Four Evolutionary Strata on the Human X Chromosome. *Science*,  
507 286(5441), pp.964–967.
- 508 Lewis, K.R. & John, B., 1968. The Chromosomal Basis of Sex Determination. In *International Review of*  
509 *Cytology*. Elsevier, pp. 277–379.
- 510 Li, H. & Durbin, R., 2009. Fast and accurate short read alignment with Burrows–Wheeler transform.  
511 *Bioinformatics*, 25(14), pp.1754–1760.
- 512 Li, H. et al., 2009. The Sequence Alignment/Map format and SAMtools. *Bioinformatics*, 25(16), pp.2078–  
513 2079.
- 514 Loytynoja, A., 2014. Phylogeny-aware alignment with PRANK. *Methods in molecular biology (Clifton, N.J.)*,  
515 1079(Chapter 10), pp.155–170.
- 516 Montiel, E.E. et al., 2016. Cytogenetic Insights into the Evolution of Chromosomes and Sex  
517 Determination Reveal Striking Homology of Turtle Sex Chromosomes to Amphibian Autosomes.  
518 *Cytogenetic and Genome Research*, 148(4), pp.292–304.
- 519 Moyle, R.G. et al., 2016. Tectonic collision and uplift of Wallacea triggered the global songbird radiation.  
520 7, 12709 EP –.

- 521 O'Meally, D. et al., 2012. Are some chromosomes particularly good at sex? Insights from amniotes.  
522 *Chromosome Research*, 20(1), pp.7–19.
- 523 Pala, I., Hasselquist, D., et al., 2012. Patterns of molecular evolution of an avian neo-sex chromosome.  
524 *Molecular Biology and Evolution*, 29(12), pp.3741–3754.
- 525 Pala, I., Naurin, S., et al., 2012. Evidence of a neo-sex chromosome in birds. *Heredity*, 108(3), pp.264–272.  
526 Available at: <http://dx.doi.org/10.1038/hdy.2011.70>.
- 527 Pennell, M. W. et al., 2015. Y Fuse? Sex Chromosome Fusions in Fishes and Reptiles. *PLOS Genetics*,  
528 11(5), e1005237. Available at: <http://doi.org/10.1371/journal.pgen.1005237>
- 529 Pokorná, M., Altmanová, M. & Kratochvíl, L., 2014. Multiple sex chromosomes in the light of female  
530 meiotic drive in amniote vertebrates. *Chromosome Research*, 22(1), pp.35–44.
- 531 Quinlan, A.R. & Hall, I.M., 2010. BEDTools: a flexible suite of utilities for comparing genomic features.  
532 *Bioinformatics*, 26(6), pp.841–842.
- 533 Rice, W.R., 1994. Degeneration of a nonrecombining chromosome. *Science*, 263(5144), pp.230–232.
- 534 Rice, W.R. & Gaines, S.D., 1994. Extending nondirectional heterogeneity tests to evaluate simply ordered  
535 alternative hypotheses. *Proceedings of the National Academy of Sciences*, 91(1), pp.225–226.
- 536 Rovatsos, M. et al., 2016. Mammalian X homolog acts as sex chromosome in lacertid lizards. *Heredity*,  
537 117(1), 8–13. Available at: <http://doi.org/10.1038/hdy.2016.18>
- 538 Ross, J.A. et al., 2009. Turnover of Sex Chromosomes in the Stickleback Fishes (Gasterosteidae). *PLOS*  
539 *Genetics*, 5(2), p.e1000391.
- 540 Ross, M.T et al. 2005. The DNA sequence of the human X chromosome. *Nature*, 434(7031), 325–337.  
541 <http://doi.org/10.1038/nature03440>  
542
- 543 Sambrook, J. & W Russel, D, 2001. *Molecular Cloning: A Laboratory Manual (3rd edition)*. Cold Spring Harbor  
544 Laboratory Press.  
545
- 546 Sigeman, H. et al., 2018. Insights into Avian Incomplete Dosage Compensation: Sex-Biased Gene  
547 Expression Coevolves with Sex Chromosome Degeneration in the Common Whitethroat. *Genes*, 9(8),  
548 p.373.
- 549 Smith, C.A. et al., 2009. The avian Z-linked gene DMRT1 is required for male sex determination in the  
550 chicken. *Nature*, 461(7261), pp.267–271.
- 551 Tange, O., 2018. *GNU Parallel 2018*, Lulu.com.
- 552 Vassart, M., Séguéla, A. & Hayes, H., 1995. Chromosomal evolution in gazelles. *Journal of Heredity*, 86(3),  
553 pp.216–227.
- 554 Warren, W.C. et al., 2010. The genome of a songbird. *Nature*, 464(7289), pp.757–762.
- 555 Yang, Z., 2007. PAML 4: Phylogenetic Analysis by Maximum Likelihood. *Molecular Biology and Evolution*,  
556 24(8), pp.1586–1591.
- 557 Yoshida, K. et al., 2014. Sex Chromosome Turnover Contributes to Genomic Divergence between  
558 Incipient Stickleback Species J. Zhang, ed. *PLOS Genetics*, 10(3), p.e1004223.

- 559 Zamani, N. et al., 2014. A universal genomic coordinate translator for comparative genomics. *BMC*  
560 *Bioinformatics*, 15(1), p.227.
- 561 Zhou, Q. et al., 2014. Complex evolutionary trajectories of sex chromosomes across bird taxa. *Science*,  
562 346(6215), pp.1246338–1246338. Available at:  
563 <http://www.sciencemag.org/cgi/doi/10.1126/science.1246338>.
